# Supplementary material for: Medication-Related Problems and Interventions Identified and Addressed by Pharmacists Conducting Enhanced Medication Therapy Management Services
Source: MDPI journal article supplement (doi:10.3390/pharmacy10050111), 2022-09-04
Supplement: s1 [file s1]

**Table S1.** Glossary of abbreviations

| <b>Abbreviation</b> | <b>Definition</b>                      |
|---------------------|----------------------------------------|
| CoMM                | Continuous medication monitoring       |
| eMTM                | Enhanced medication therapy management |
| IMECS               | Iowa Medication Complexity Score       |
| MMSs                | Medication management services         |
| MRP                 | Medication-related problem             |
| MSR                 | Medication safety review               |
| MTM                 | Medication therapy management          |
